# Supplementary material for: Paroxetine Administration Affects Microbiota and Bile Acid Levels in Mice
Source: PubMed Central journal article supplement (PMC7287167; doi:10.3389/fpsyt.2020.00518), 2020-06-04
Supplement: DataSheet_1.pdf [file DataSheet_1.pdf]

# Paroxetine administration affects microbiota and bile acid levels in mice

## Supplementary Material

Frederik Dethloff<sup>1\*</sup>, Fernando Vargas<sup>2,3,4\*</sup>, Emmanuel Elijah<sup>2,3</sup>, Robert Quinn<sup>2,3§</sup>, Dong Ik Park<sup>1#</sup>, David P. Herzog<sup>5</sup>, Marianne B. Müller<sup>5</sup>, Emily C. Gentry<sup>2,3</sup>, Rob Knight<sup>6</sup>, Antonio Gonzalez<sup>7</sup>, Pieter C. Dorrestein<sup>2,3</sup>, Christoph W. Turck<sup>1+</sup>

<sup>1</sup> Max Planck Institute of Psychiatry, Department of Translational Research in Psychiatry, Munich, Germany.

<sup>2</sup> Skaggs School of Pharmacy and Pharmaceutical Sciences, University of California, San Diego, La Jolla, CA, USA.

<sup>3</sup> Collaborative Mass Spectrometry Innovation Center, Skaggs School of Pharmacy and Pharmaceutical Sciences, University of California, San Diego, La Jolla, CA, USA.

<sup>4</sup> Division of Biological Science, University of California, San Diego, La Jolla, CA, USA.

<sup>5</sup> Laboratory of Translational Psychiatry, Department of Psychiatry and Psychotherapy & Focus Program Translational Neuroscience, Johannes Gutenberg University Medical Center, Mainz, Germany.

<sup>6</sup> Department of Pediatrics, Bioengineering and Computer Science and Engineering, and Center for Microbiome Innovation, University of California, San Diego, La Jolla, CA, USA

<sup>7</sup> Department of Pediatrics, University of California, San Diego, La Jolla, CA, USA

\* These authors contributed equally to this work.

§ Present address:

Michigan State University, Department of Biochemistry and Molecular Biology, 603 Wilson Rd, Rm 116B, East Lansing, MI 48824, USA

# Present address:

Aarhus University, Department of Biomedicine, Ole Worms Allé 3, 8000 Aarhus C, Denmark

+ Corresponding author:

Christoph W. Turck  
Max Planck Institute of Psychiatry  
Kraepelinstrasse 2-10  
80804 Munich, Germany

Phone: +49-89-30622317

E-mail: [turck@psych.mpg.de](mailto:turck@psych.mpg.de)

**A**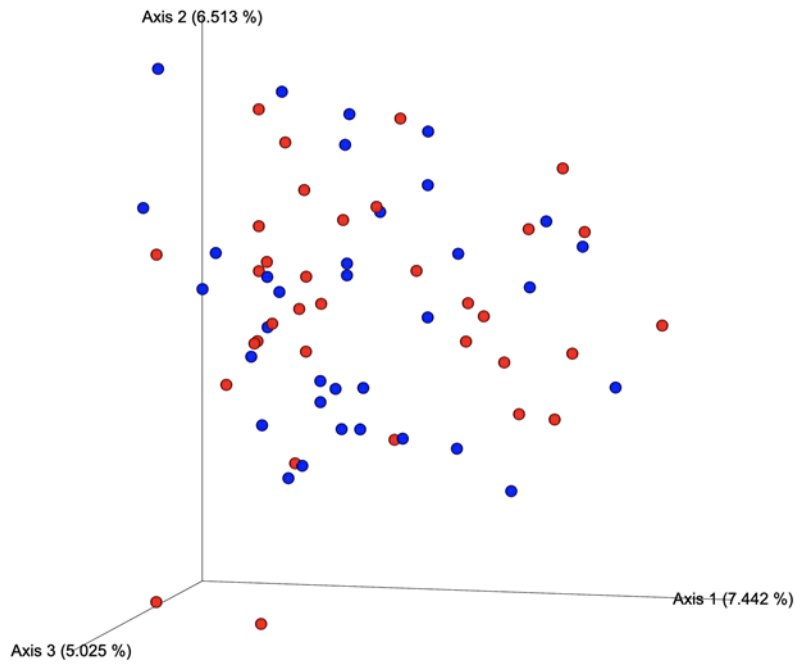**B**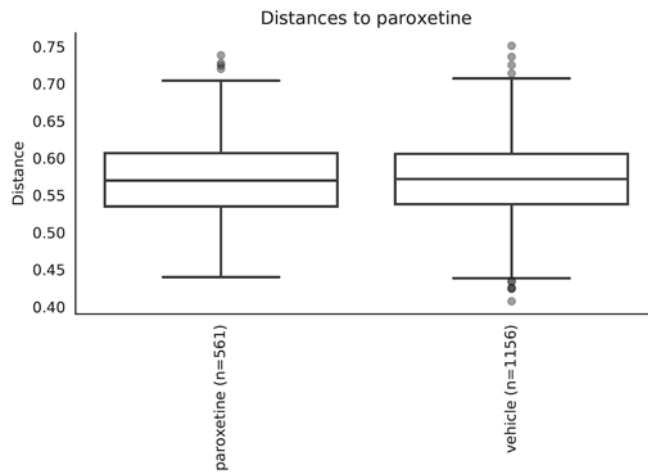

**Supplementary Figure 1.** (A) Unweighted UniFrac microbiome distances projected using principle coordinate analysis for analysis of beta-diversity of the microbiome data. Blue spheres are fecal samples from vehicle-treated mice (n=34), red spheres are samples from paroxetine-treated mice (n=34). (B) Boxplots of unweighted UniFrac distances of samples in PCoA plot above used to calculate PERMANOVA testing. p-value from the PERMANOVA test is 0.982.

**A**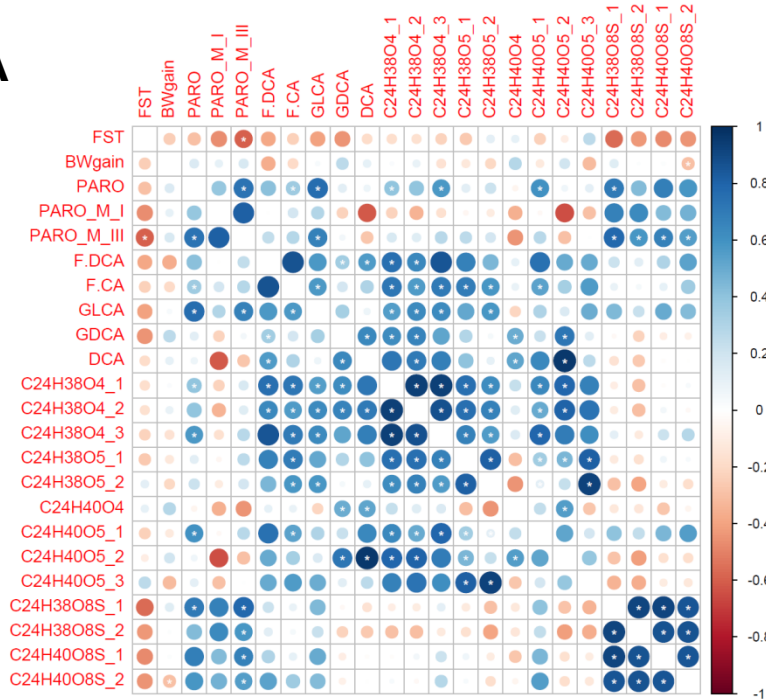**B**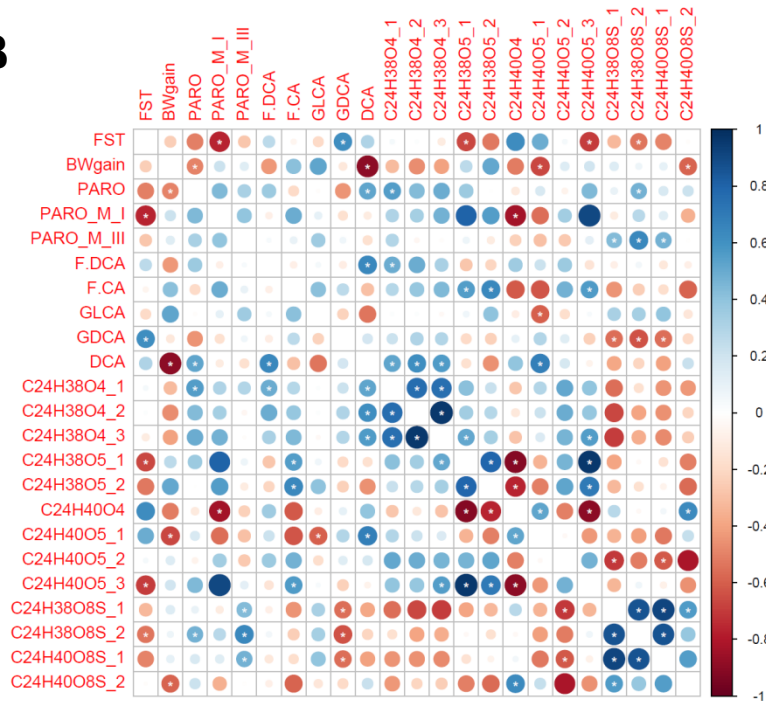

**Supplementary Figure 2:** Fecal pellet bile acid levels are associated with body weight gain, behavior, and other bile acid levels. Correlation matrix is based on Spearman correlation. Significance is indicated by white asterisk ( $p < 0.1$ ). (A) One week treatment and (B) two weeks treatment. Correlations are based on the paroxetine (PARO)-treated mouse group ( $n=10$ ).

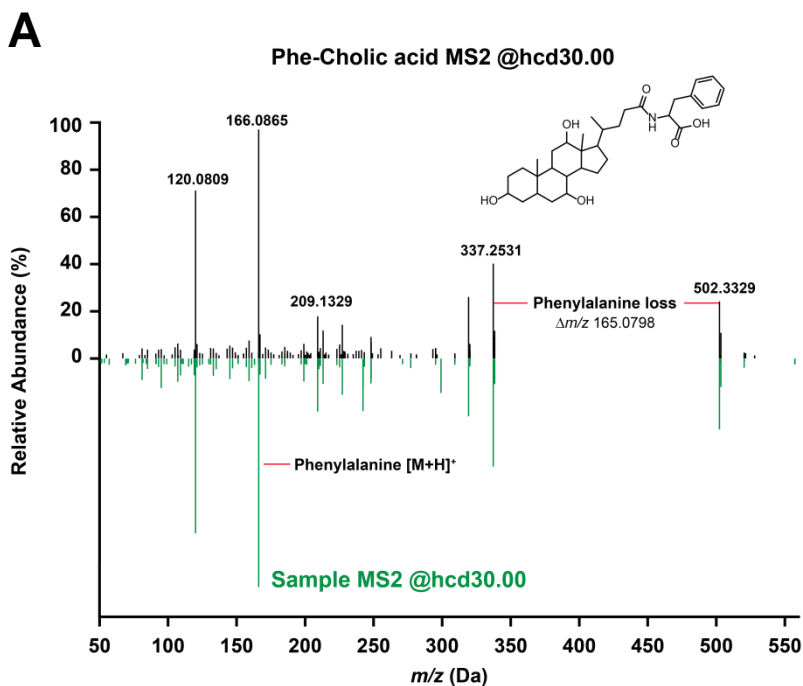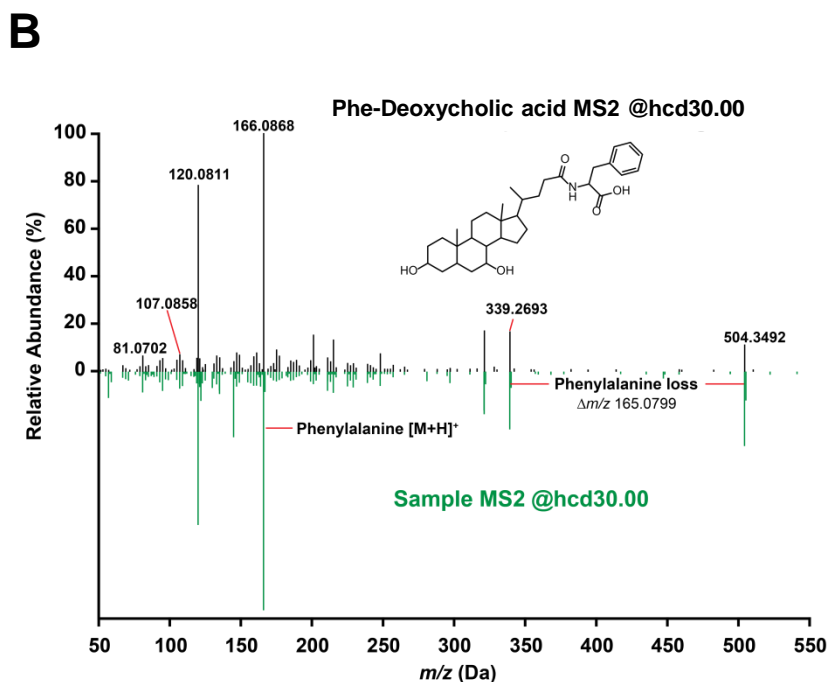

**Supplementary Figure 3:** (A) MS2 spectrum of the newly found phenylalanochoic acid (Phe-Cholic acid) molecule in the sample mirrored against the Phe-Cholic acid molecule found in the GNPS database. (B) MS2 spectrum of the newly found phenylalanodeoxycholic acid (Phe-Deoxycholic acid) molecule in the sample mirrored against the Phe-Deoxycholic acid molecule found in the GNPS database. Second best hit was to phenylchenodeoxycholic acid spectrum.

## Supplementary Table 1: Parameters used for MZmine feature detection

|                                                                                                                                                                                                                                                                                                                                                                    |                                                                                                                                               |
|--------------------------------------------------------------------------------------------------------------------------------------------------------------------------------------------------------------------------------------------------------------------------------------------------------------------------------------------------------------------|-----------------------------------------------------------------------------------------------------------------------------------------------|
| <b>Crop filtering</b><br>Retention time: 0 – 5.6 min<br>m/z: 50 – 5990                                                                                                                                                                                                                                                                                             | <b>Isotope peak grouper:</b><br>m/z tolerance: 0.01 m/z or 10 ppm<br>Retention time tolerance (min): 0.1<br>Maximum charge: 4                 |
| <b>Mass detection</b><br>MS1 mass detector: 2.0 E5<br>MS2 mass detector: 1.0 E2                                                                                                                                                                                                                                                                                    | <b>Join Alignment</b><br>m/z tolerance: 0.005 m/z or 10 ppm<br>Weight for m/z: 90<br>Retention time tolerance (min): 0.3<br>Weight for RT: 10 |
| <b>ADAP Chromatogram builder</b><br>Min group size in # scans 5<br>Group intensity threshold 2.0E5<br>Min time span (min): 0.05<br>Min highest intensity: 6.0 E5<br>m/z tolerance: 0.005 m/z or 10 ppm                                                                                                                                                             | <b>Peak list row filter</b><br>Minimum peaks in a row: 2<br>Reset the peak number ID                                                          |
| <b>Chromatogram deconvolution</b><br>Local min search<br>Chromatogram threshold: 0.01%<br>Search minimum in RT range (min): 0.40<br>Min relative height: 0.01%<br>Min absolute height: 6.0 E5<br>Min ration of peak top/edge: 3<br>Peak duration range (min): 0.05 – 0.40<br>m/z range for MS2 scan pairing (Da): 0.05<br>RT range for MS2 scan pairing (min): 0.2 | <b>Gap fill</b><br>Intensity tolerance: 20%<br>m/z tolerance: 0.01 m/z or 10 ppm<br>Retention time tolerance (min): 0.2                       |

**Supplementary Table 2:** Metabolite and meta data from mouse behavior experiments (Supplementary Table 2.xlsx).
